# Supplementary material for: Assessment of the Finite-volumE Sea ice-Ocean Model (FESOM2.0) – Part 1: Description of selected key model elements and comparison to its predecessor version
Source: Copernicus journal article supplement (doi:10.5194/gmd-12-4875-2019), 2019-11-25
Supplement: Supplementary file 1 [file gmd-12-4875-2019-supplement.pdf]

Supplement of Geosci. Model Dev., 12, 4875–4899, 2019  
<https://doi.org/10.5194/gmd-12-4875-2019-supplement>  
© Author(s) 2019. This work is distributed under  
the Creative Commons Attribution 4.0 License.

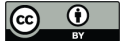

*Supplement of*

## **Assessment of the Finite-volumeE Sea ice-Ocean Model (FESOM2.0) – Part 1: Description of selected key model elements and comparison to its predecessor version**

**Patrick Scholz et al.**

*Correspondence to:* Patrick Scholz ([patrick.scholz@awi.de](mailto:patrick.scholz@awi.de))

The copyright of individual parts of the supplement might differ from the CC BY 4.0 License.

# Supplement

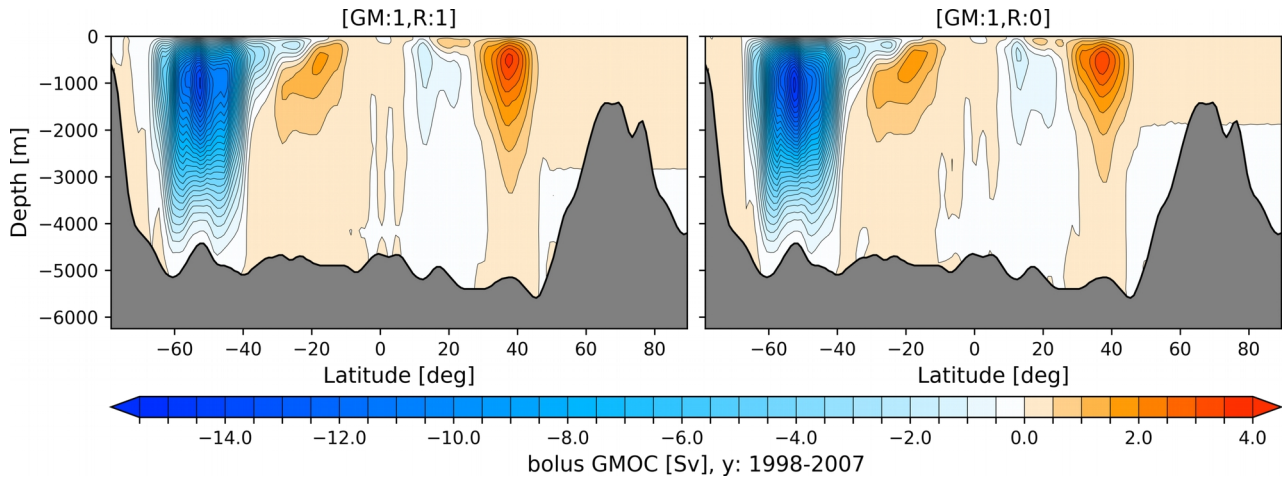

**Figure S1: Global Meridional Overturning Circulation (GMOC) associated with the Gent McWilliams vertical bolus velocity, averaged for the time period 1998-2007, for the reference simulation (left) and the simulation in which the Redi diffusivity is set to zero (right).**

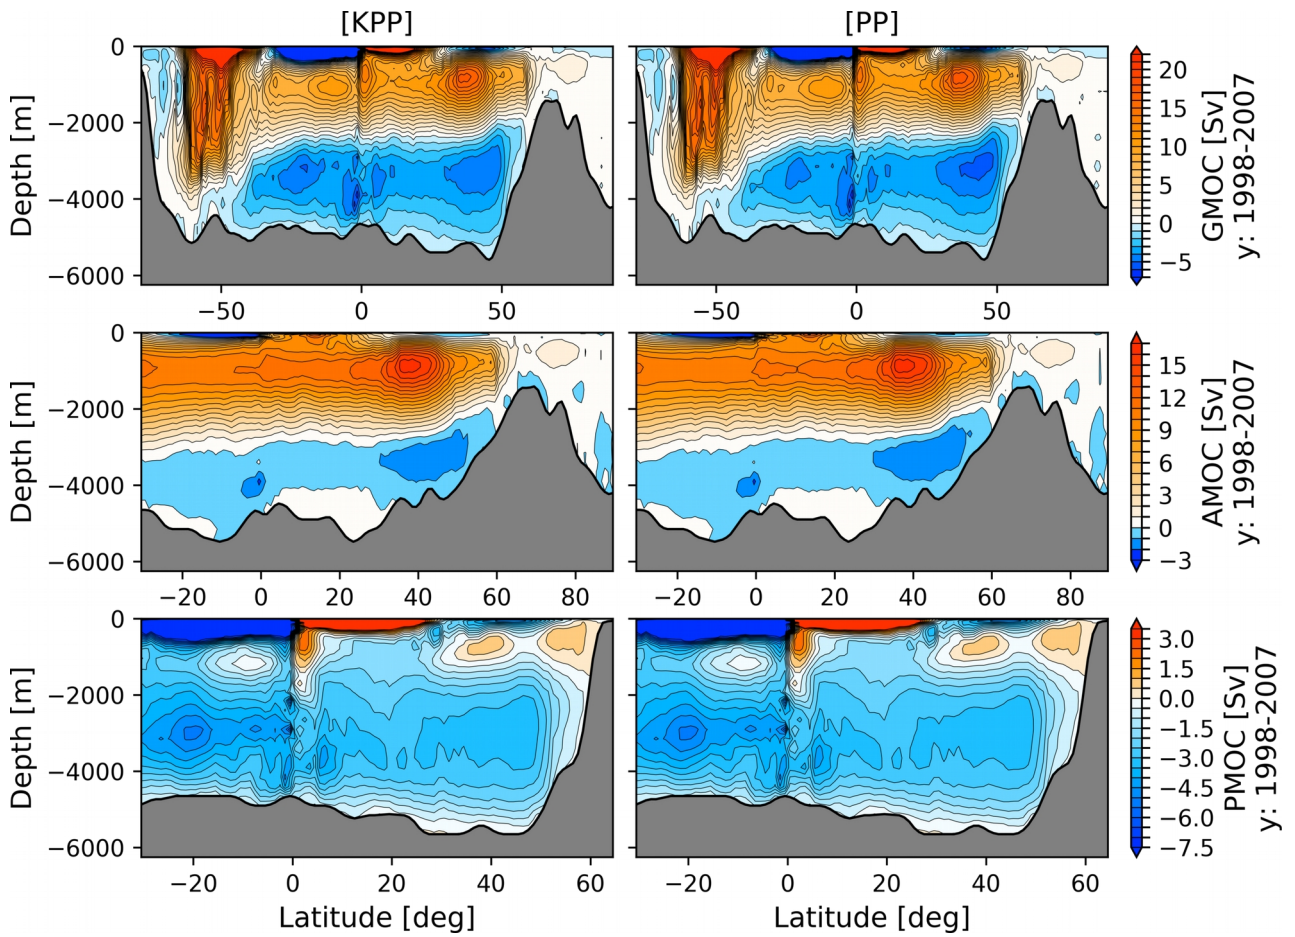

**Figure S2: Global (GMOC, upper row), Atlantic (AMOC, middle row) and Indo-Pacific (PMOC, lower row) Meridional Overturning Circulation averaged for the time period 1998-2007 for the simulations with KPP (left column) and PP (right column) vertical mixing.**

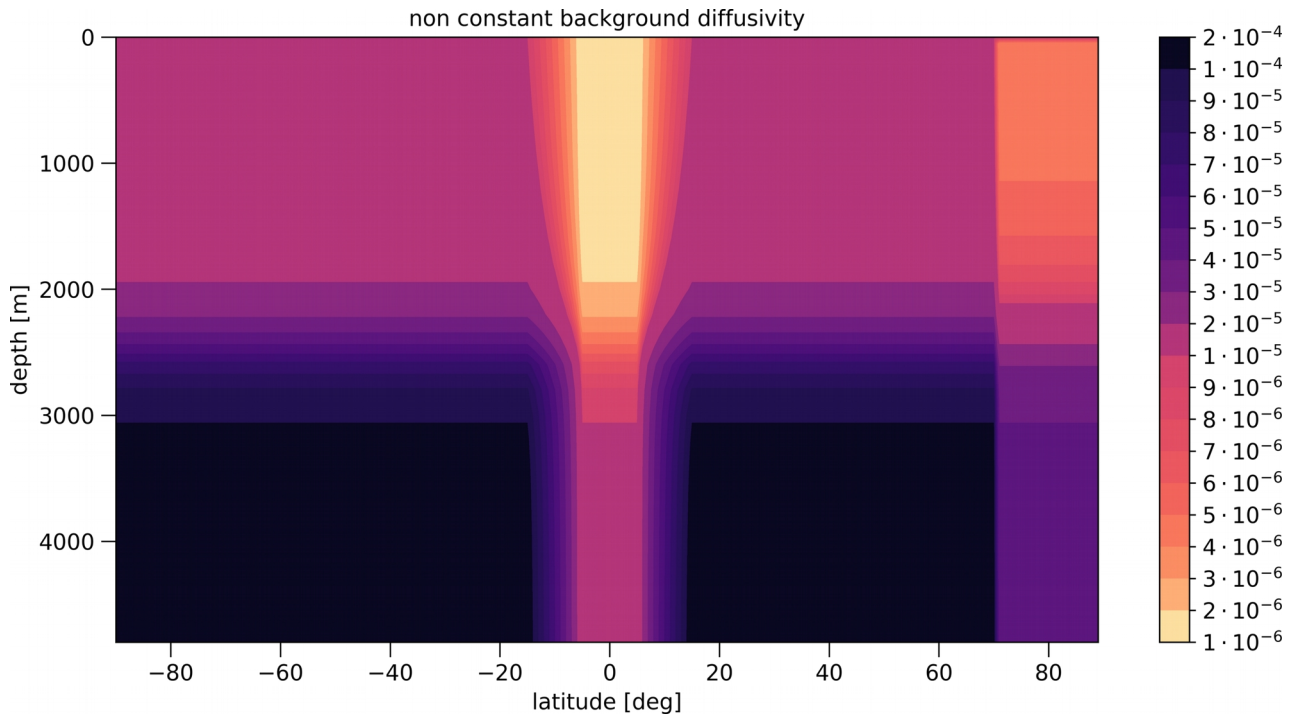

Figure S3: Depth and latitude dependent background vertical diffusivity used in PP and KPP vertical mixing scheme.

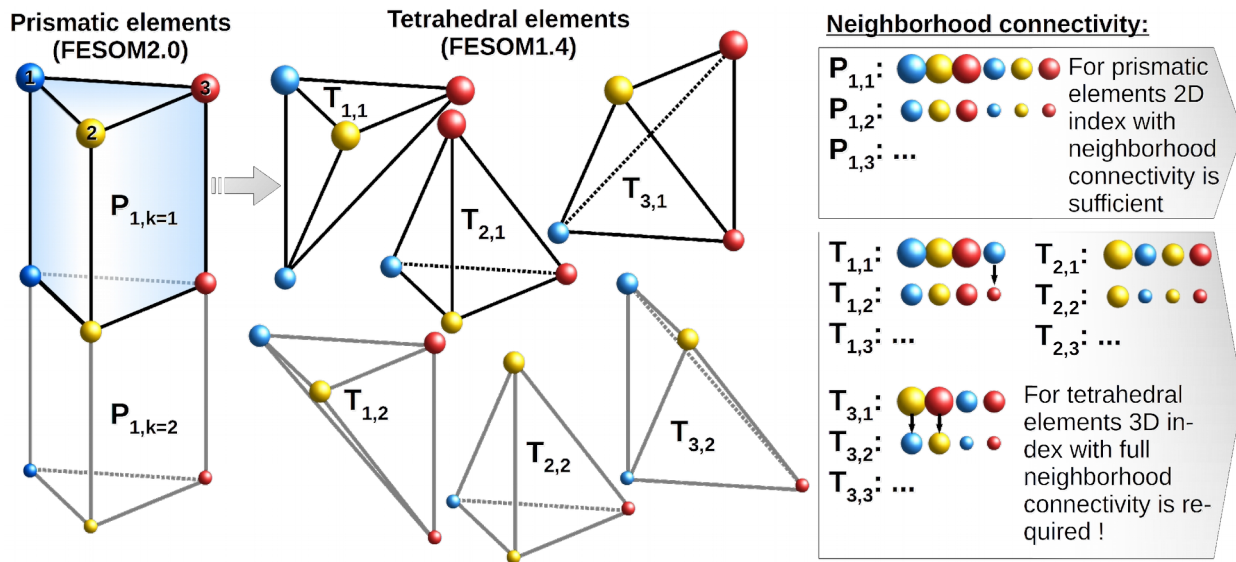

Figure S4: Schematic representation of neighborhood connectivity between prismatic and tetrahedral elements.
